# Supplementary material for: miR-18a promotes glioblastoma development by down-regulating ALOXE3-mediated ferroptotic and anti-migration activities
Source: PubMed Central journal article supplement (PMC7881152; doi:10.1038/s41389-021-00304-3), 2021-02-12
Supplement: 41389_2021_304_MOESM1_ESM.pdf [file 41389_2021_304_MOESM1_ESM.pdf]

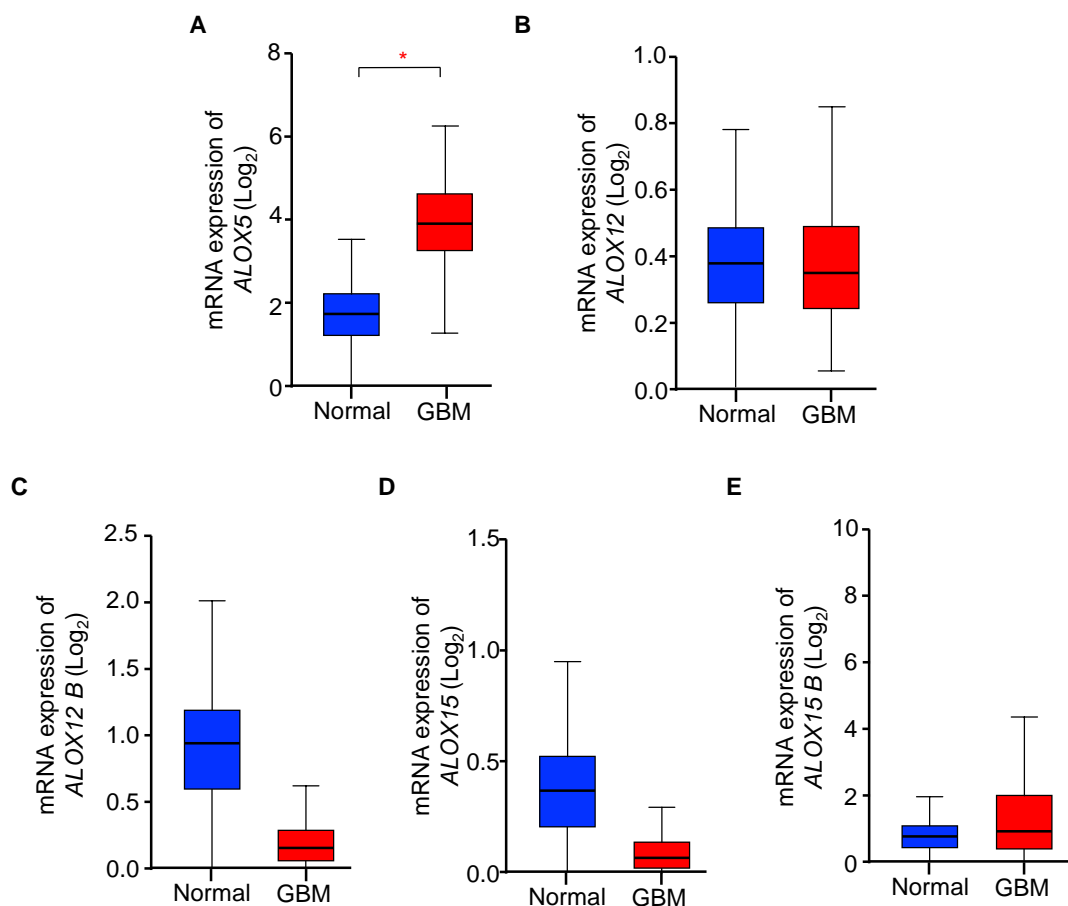

**Figure S1. Expression of LOXs in human GBM.**

Gene expression profile interactive analysis of relative mRNA levels of (A) *ALOX5*, (B) *ALOX12*, (C) *ALOX12B*, (D) *ALOX15* and (E) *ALOX15B* in human normal brain tissues and GBM (n=207 for normal brain tissue and n=163 for GBM). \*p<0.05, (Student's t test).

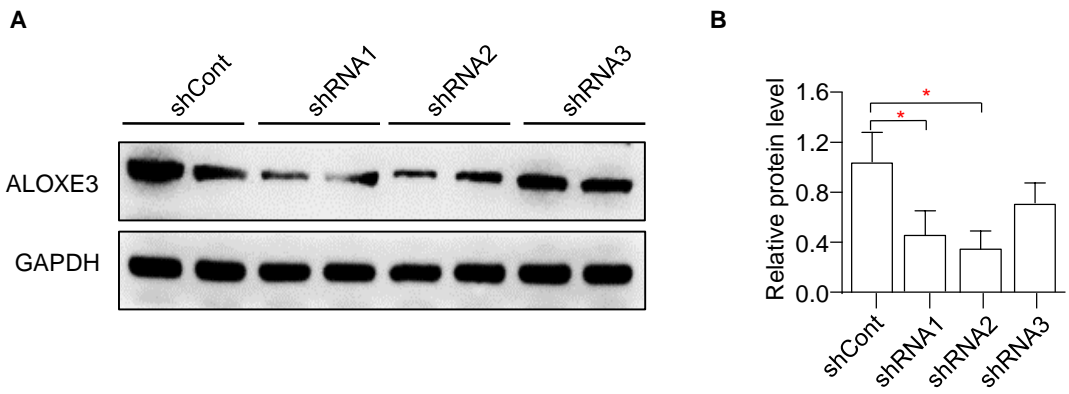

**Figure S2. Knockdown of ALOXE3 by shRNAs in U87 GBM cells.**

(A) Immunoblotting analysis of ALOXE3 and GAPDH in U87 cells expressing shRNAs targeting human ALOXE3. Representative images are shown. (B) The bar chart is relative expression level of ALOXE3 normalized with GAPDH (n=6). All data are represented as the mean  $\pm$  s.e.m. \* $p < 0.05$  (Student's t test).

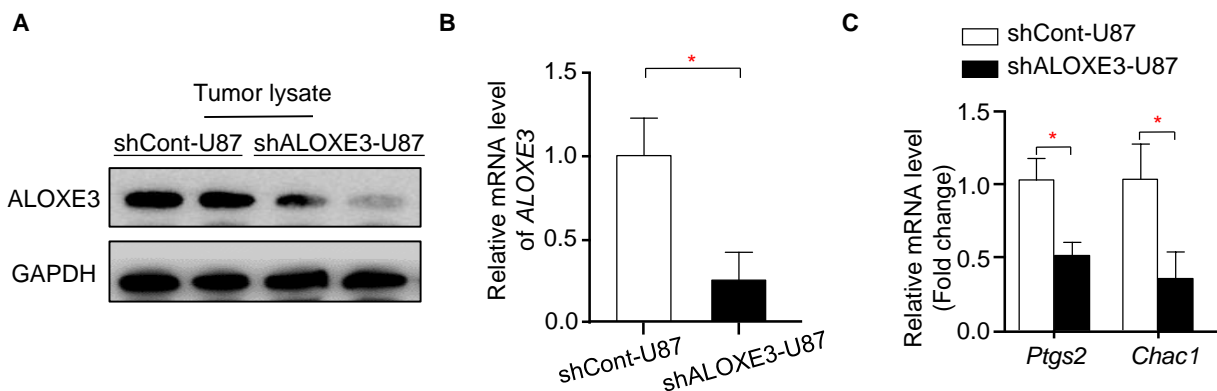

**Figure S3. ALOXE3 and ferroptotic genes are significantly decreased in tumors harvested from mice orthotopically implanted with shALOXE3-U87 cells.**

Orthotopic tumors isolated from hippocampus of immunodeficient mice were used (n=6). (A) Immunoblotting analysis of ALOXE3 and GAPDH in orthotopic tumors. Representative immunoblot images are shown. (B) Relative mRNA level of *ALOXE3* normalized with *GAPDH* in orthotopic tumors. (C) Relative mRNA levels of *Ptgs2* and *Chac1* normalized with *GAPDH* in orthotopic tumors. All data are represented as the mean  $\pm$  s.e.m. \*p<0.05 (Student's t test).

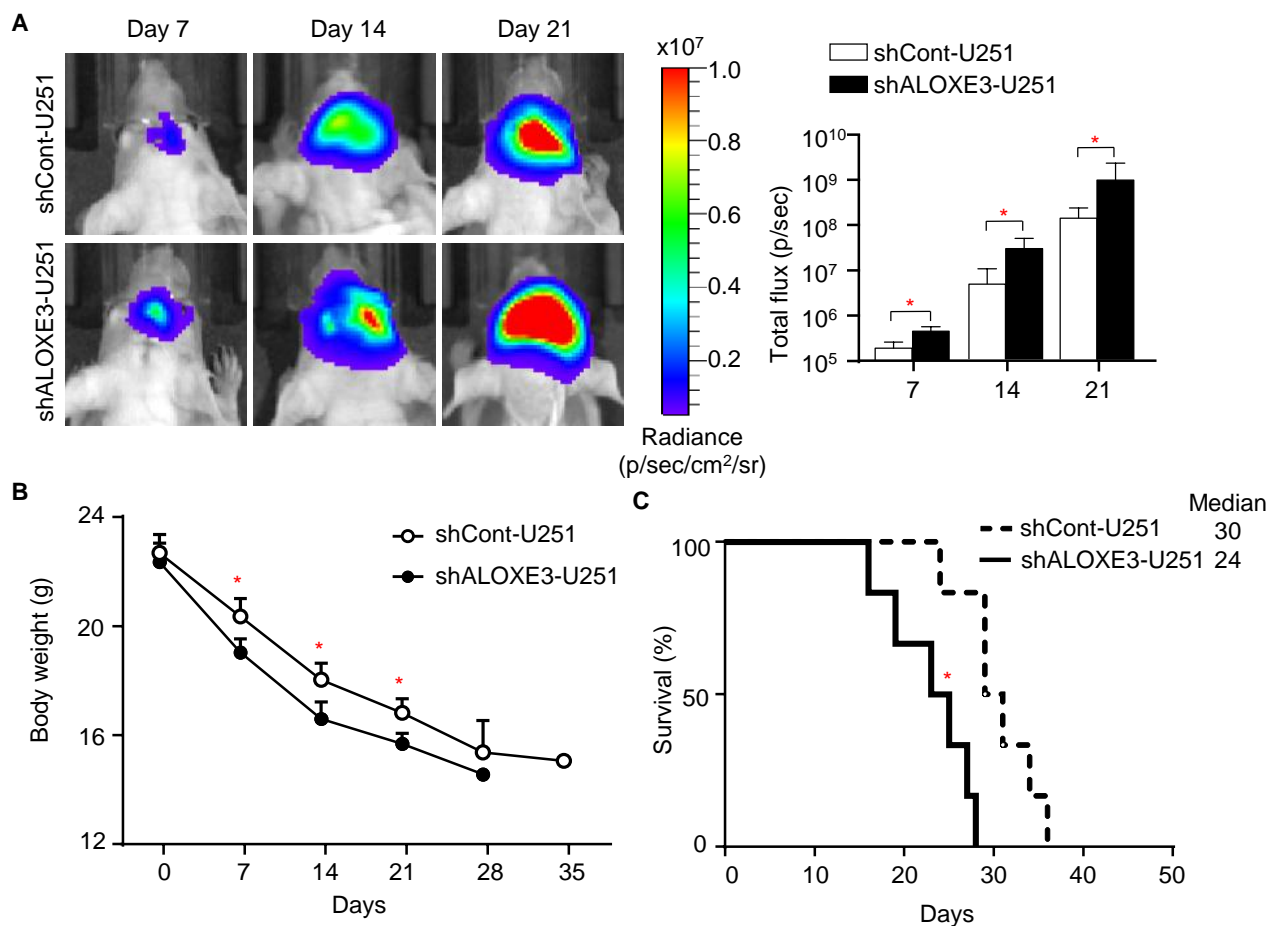

**Figure S4. Inhibitory effects of ALOXE3 on GBM were observed in U251 GBM cells.**

shALOXE3-U251 and shCont-U251 cells were implanted orthotopically into the hippocampus of immunodeficient nude mice ( $n=6$ ). (A) *In vivo* bioluminescent imaging of nude mice at indicated time points. The right panel is the quantification of luminescence signal intensity. (B) Body weight of mice. All data are represented as the mean  $\pm$  s.e.m.  $*p<0.05$  (Student's *t* test). (C) Survival curve of mice. Medians are shown.  $*p<0.05$  (Long-rank test).

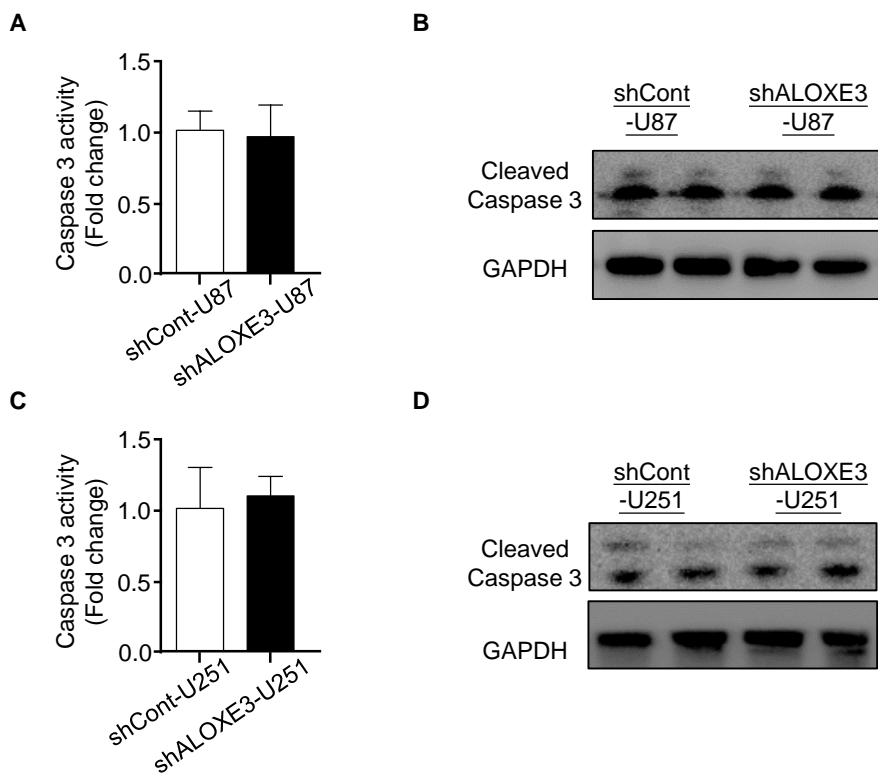

**Figure S5. Apoptosis was not affected by ALOXE3 knockdown in GBM cells.**

(A) Activity of caspase 3 in shALOXE3-U87 and shCont-U87 cells (n=6). (B) Immunoblotting analysis of Cleaved caspase 3 and GAPDH in shALOXE3-U87 and shCont-U87 cells. Representative immunoblot images are shown (n=6). (C) Activity of caspase 3 in shALOXE3-U251 and shCont-U251 cells (n=6). (D) Immunoblotting analysis of Cleaved caspase 3 and GAPDH in shALOXE3-U251 and shCont-U251 cells. Representative immunoblot images are shown (n=6). All data are represented as the mean  $\pm$  s.e.m.

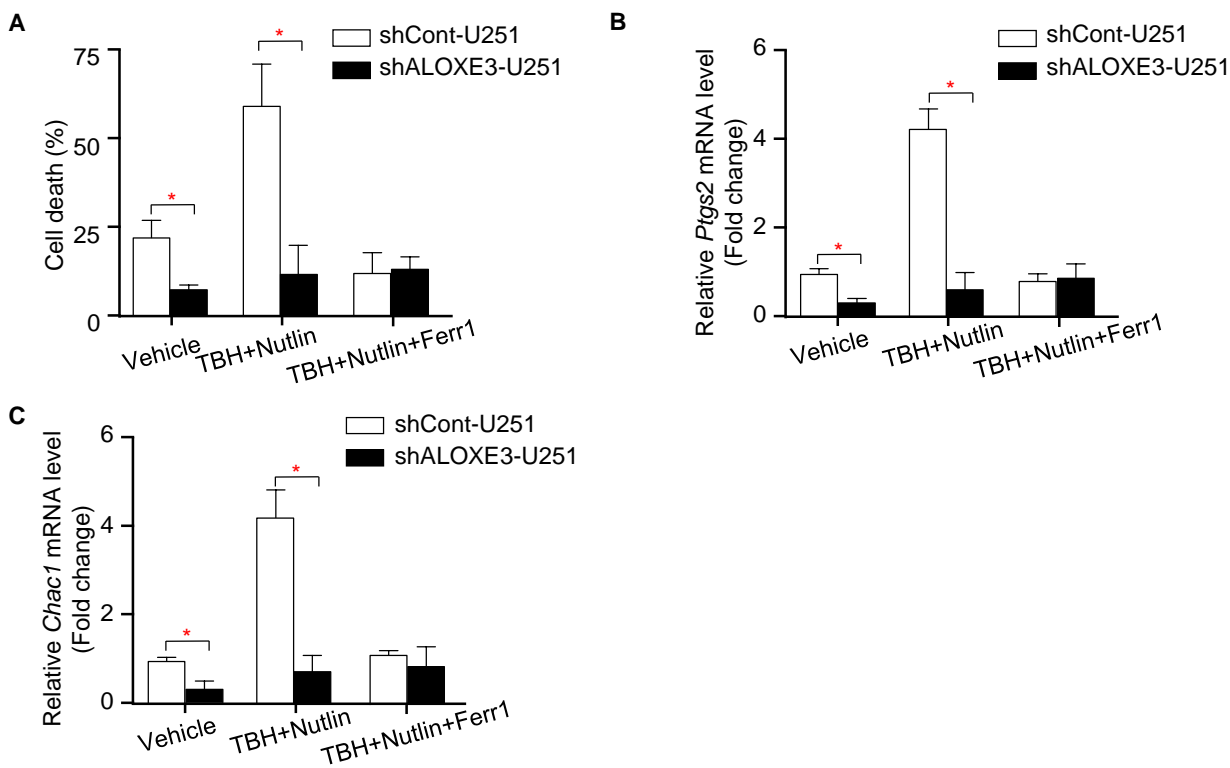

**Figure S6. Resistance to ferroptosis was observed in U251 GBM cells with ALOXE3 deficiency.**

shALOXE3-U251 and shCont-U251 cells were pre-treated with Nutlin-3a for 12 hours and followed with TBH and Nutlin-3a +/- Ferr1 treatment for additional 8 hours (n=6). (A) Cells death. (B-C) Relative mRNA levels of (B) *Ptgs2* and (C) *Chac1* normalized with *GAPDH* in cells. All data are represented as the mean  $\pm$  s.e.m. \*p<0.05 (Student's t test).

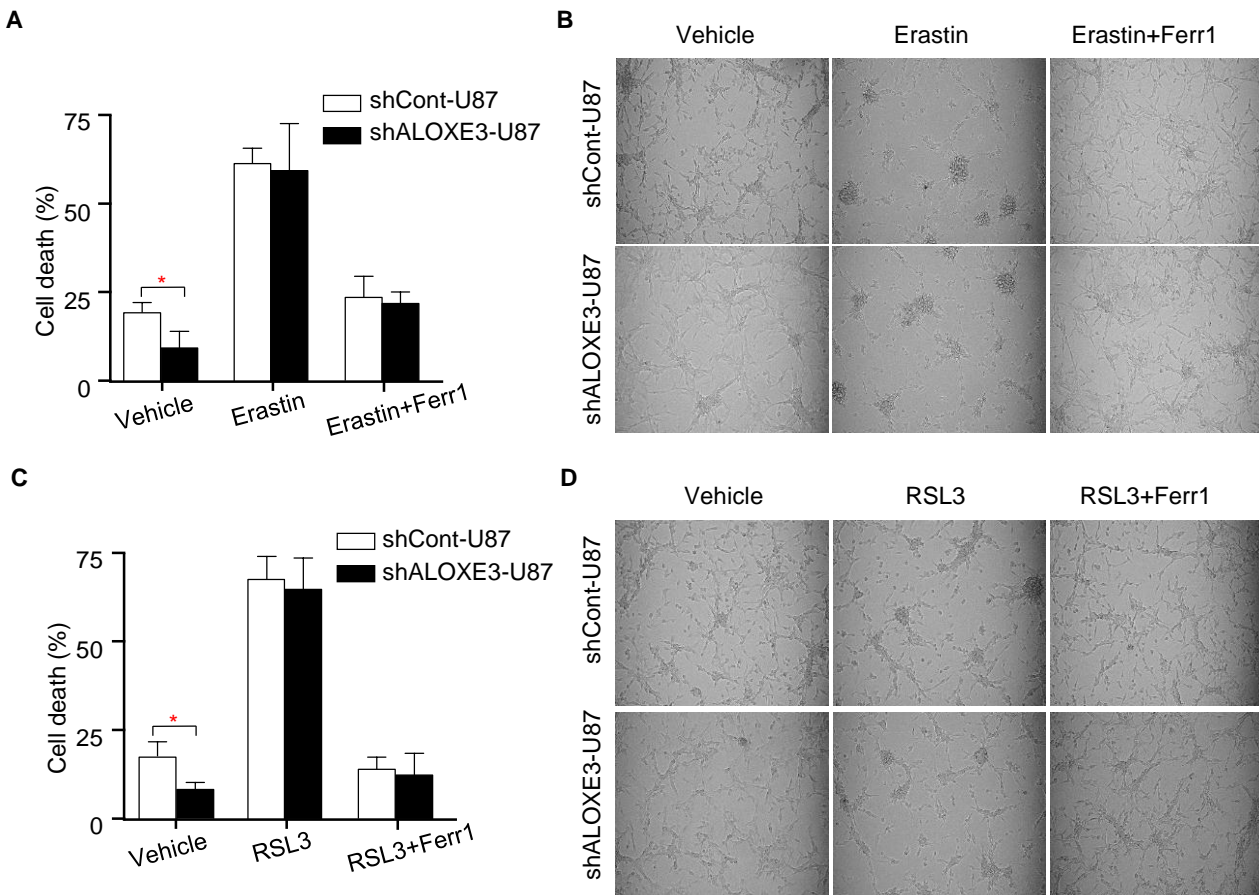

**Figure S7. ALOXE3 is dispensable for ferroptosis induced by Erastin or RSL3.**

(A-B) shALOXE3-U87 and shCont-U87 cells were treated with Erastin +/- Ferr1 for 12 hours (n=6). (A) Trypan blue staining for cells death. (B) Representative images of cells. (C-D) shALOXE3-U87 and shCont-U87 cells were treated with RSL3 +/- Ferr1 for 12 hours (n=6). (C) Trypan blue staining for cells death. (D) Representative images of cells. All data are represented as the mean  $\pm$  s.e.m. \*p<0.05 (Student's t test).

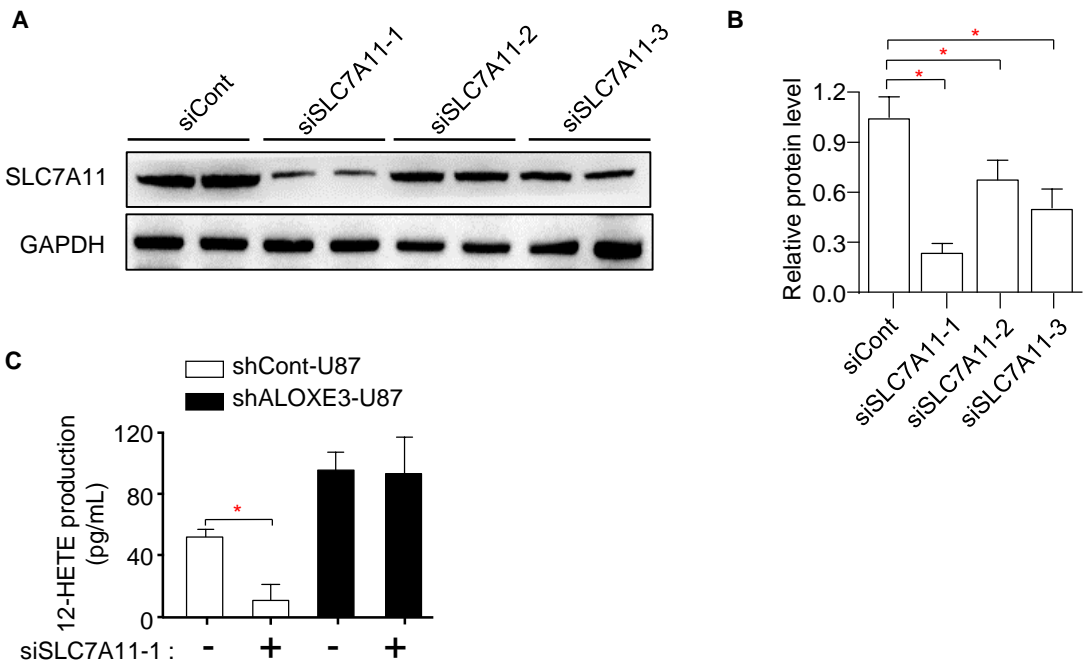

**Figure S8. SLC7A11 silencing by siRNAs in U87 GBM cells.**

(A) Immunoblotting analysis of SLC7A11 and GAPDH in U87 cells transfected with siRNAs against human SLC7A11. Representative images are shown. (B) The bar chart is relative expression level of SLC7A11 normalized with GAPDH (n=6). (C) 12-HETE levels of culture medium harvested from shALOXE3-U87 and shCont-U87 cells transfected with siSLC7A11-1 or siCont (n=6). All data are represented as the mean $\pm$ s.e.m. \*p<0.05 (Student's t test).



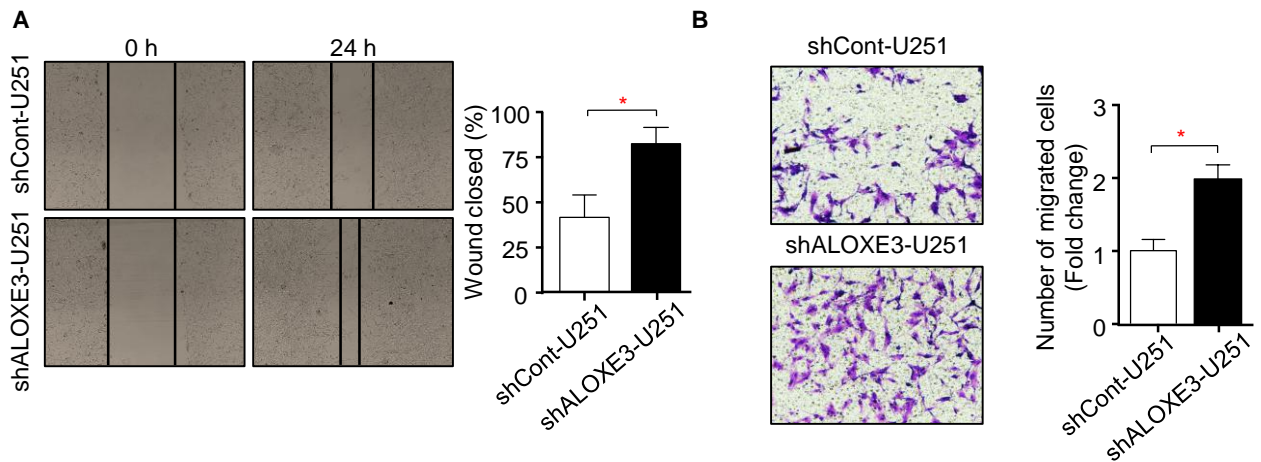

**Figure S9. Enhanced migration in U251 GBM cells with ALOXE3 deficiency.**

(A) Wound healing assay of shALOXE3-U251 and shCont-U251 cells was determined at 0 and 24 hours after wound was created. The right panel is the percentage of wound closed at 24 hours (n=6). (B) Transwell assay of shALOXE3-U251 and shCont-U251 cells. The right panel is the quantification of the number of migrated cells (n=6). All data are represented as the mean  $\pm$  s.e.m. \*p<0.05 (Student's t test).

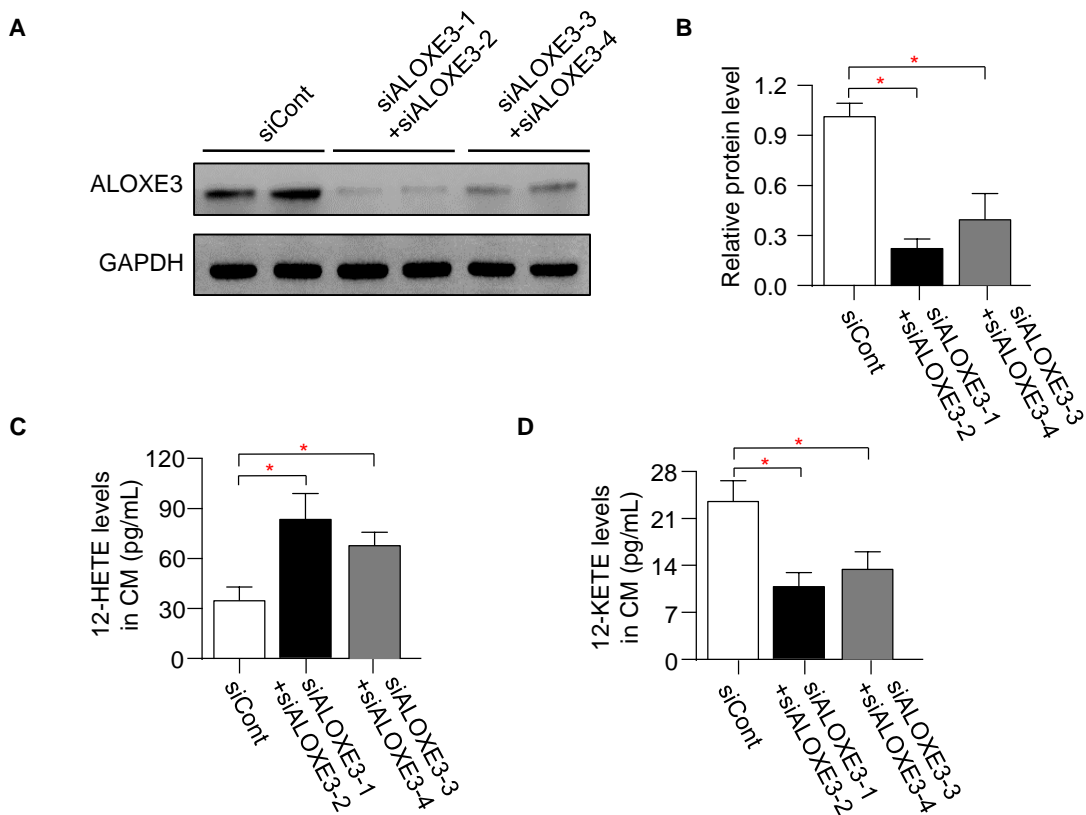

**Figure S10. ALOXE3 silencing by siRNAs in U87 GBM cells.**

(A) Immunoblotting analysis of ALOXE3 and GAPDH in U87 cells transfected with siRNAs against human ALOXE3. Representative images are shown. (B) The bar chart is relative expression level of ALOXE3 normalized with GAPDH (n=6). (C-D) Levels of (C) 12-HETE and (D) 12-KETE in culture medium harvested from U87 cells transfected with siALOXE3 or siCont (n=6). All data are represented as the mean±s.e.m. \*p<0.05 (One-way ANOVA).

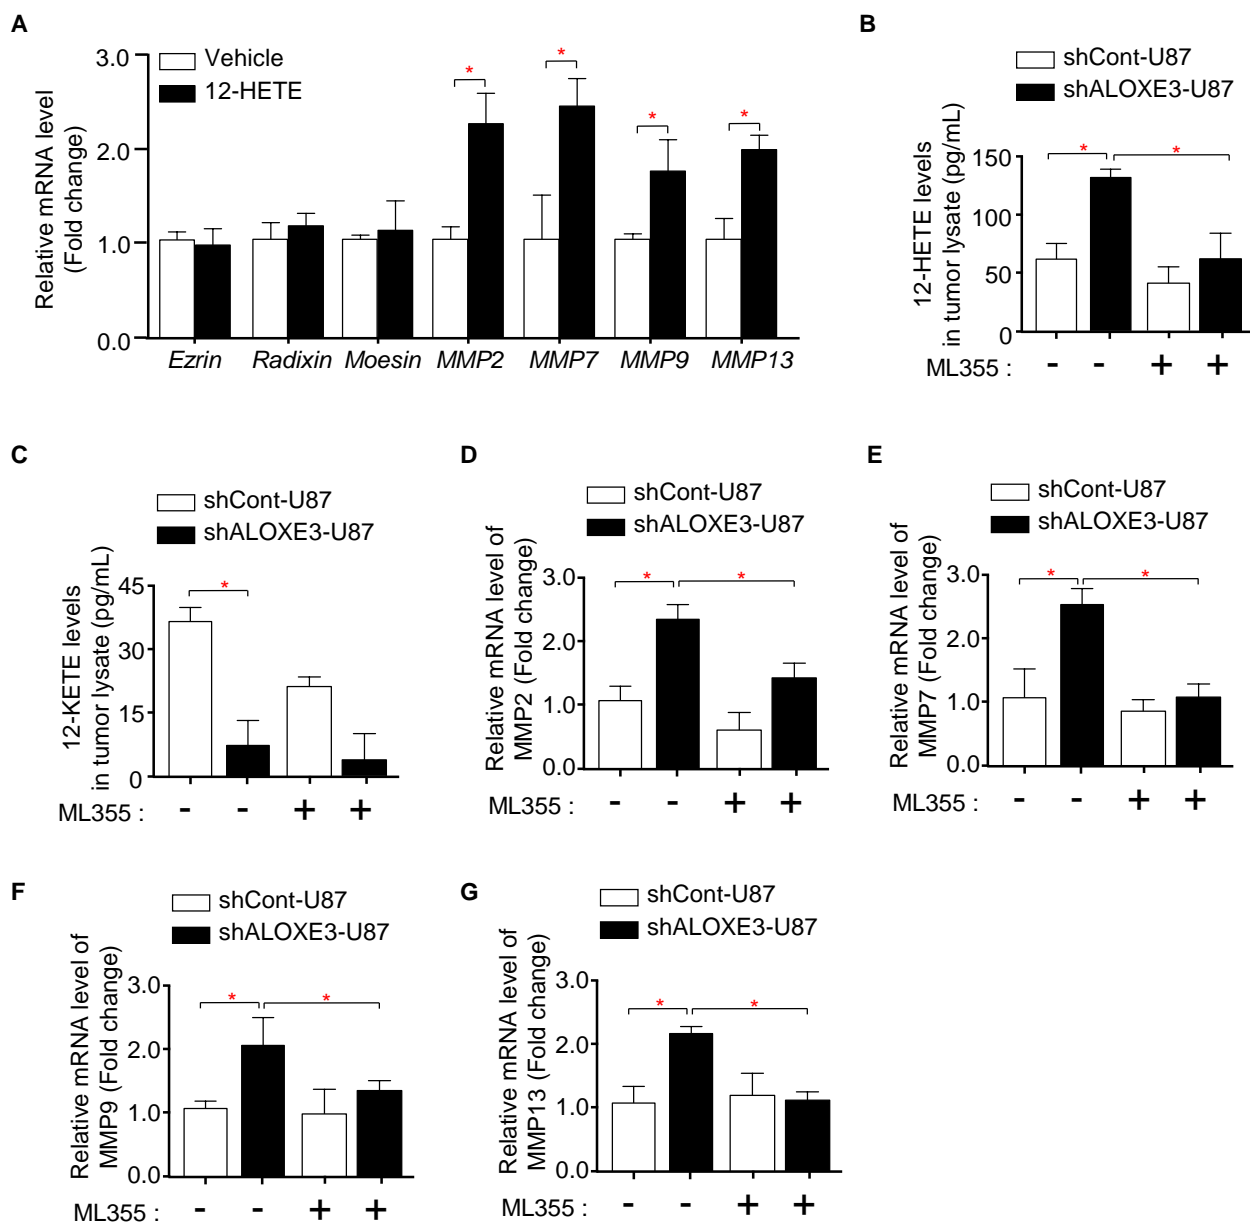

**Figure S11. ML355 largely rescued the migration-promoting effects of shALOXE3-U87 cells in mice.**

(A) Relative mRNA levels of *Ezrin*, *Radixin*, *Moesin*, *MMP2*, *MMP7*, *MMP9* and *MMP13* normalized with *GAPDH* in cells treated with 12-HETE or Vehicle control were used (n=6). (B-G) shALOXE3-U87 and shCont-U87 cells were implanted orthotopically into the hippocampus of immunodeficient nude mice, and followed by oral gavage with ML355 (15mg/kg) or DMSO as vehicle control every two days (n=6). (B-C) Circulating levels of (B) 12-HETE and (C) 12-KETE in tumor lysates. (D-G) Relative mRNA levels of (D) *MMP2*, (E) *MMP7*, (F) *MMP9* and (G) *MMP13* normalized with *GAPDH*. All data are represented as the mean  $\pm$  s.e.m. \*p<0.05 (Student's t test).

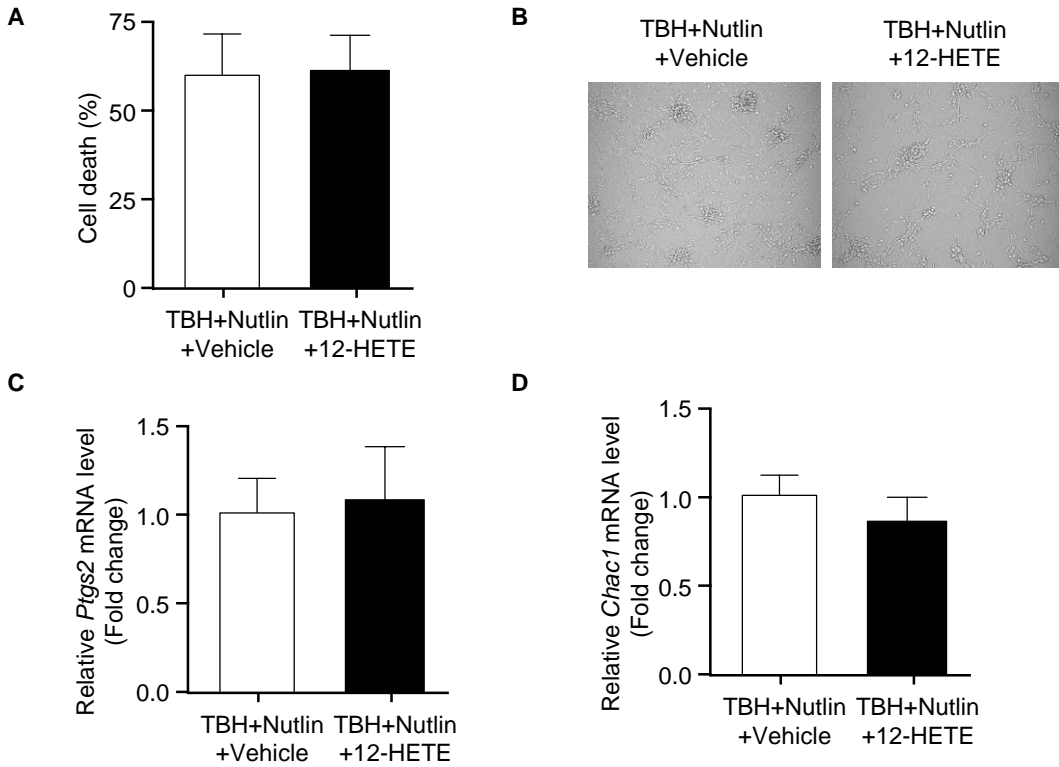

**Figure S12. 12-HETE has no effect on p53-induced ferroptosis in GBM cells.**

U87 cells with p53-induced ferroptosis (treated with TBH and Nutlin-3a) were subjected to 12-HETE or Vehicle treatment (n=6). (A) Trypan blue staining for cells death. (B) Representative images of cells. (C-D) Relative mRNA levels of (C) *Ptgs2* and (D) *Chac1* normalized with *GAPDH* in cells. All data are represented as the mean  $\pm$  s.e.m. (Student's t test).

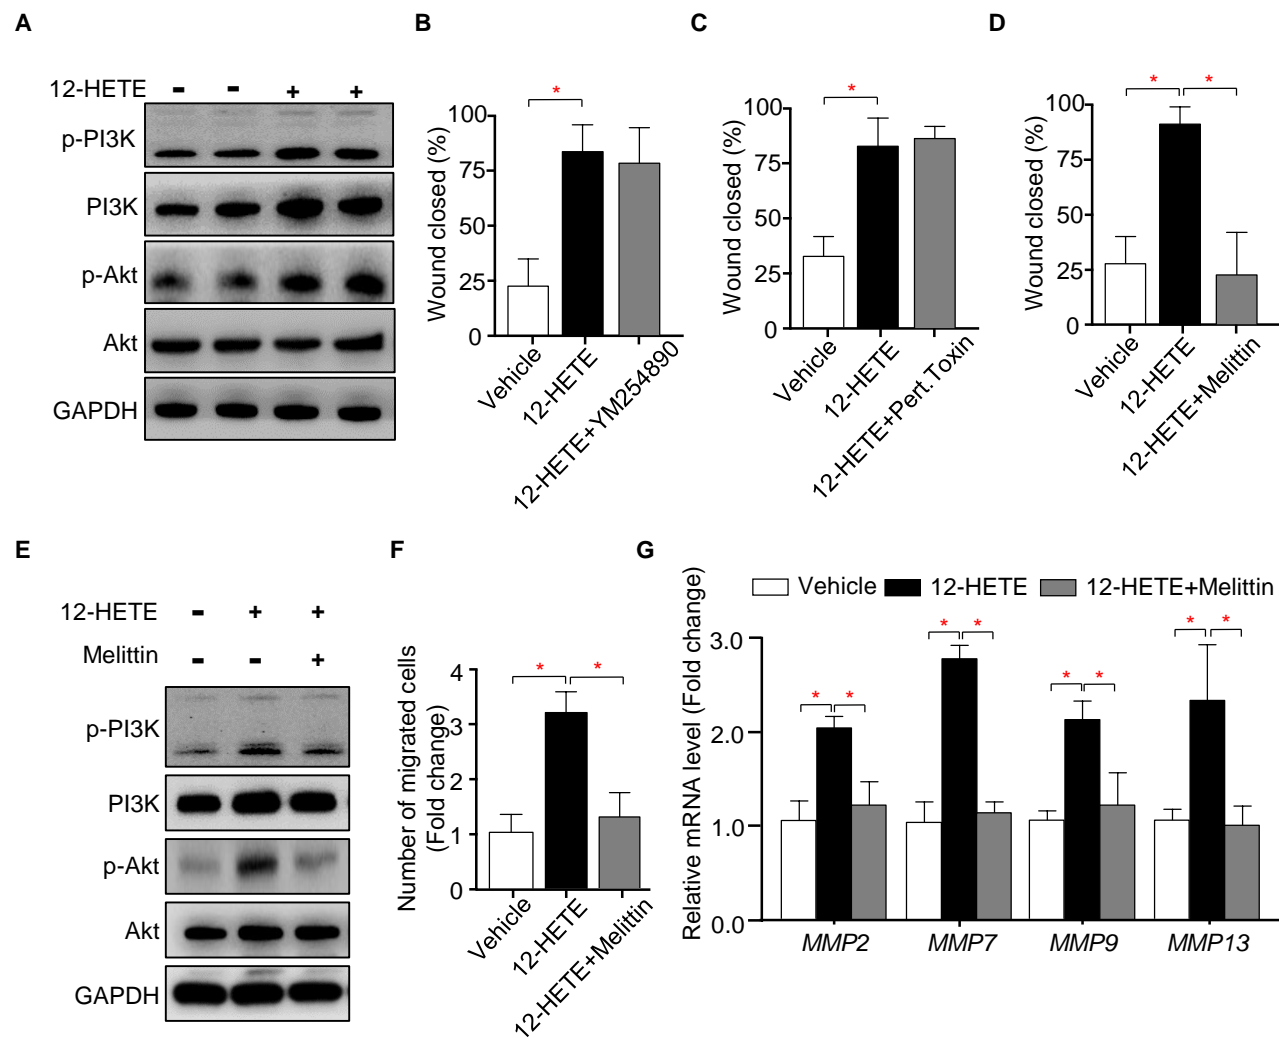

**Figure S13. 12-HETE enhances migration of GBM cells via  $G_s$ PCR-PI3K-Akt pathway.**

(A-D) U87 cells treated with 12-HETE or Vehicle control were used (n=6). (A) Immunoblotting analysis of p-PI3K, PI3K, p-Akt, Akt and GAPDH in cells. Representative immunoblot images are shown. (B-D) Wound healing assay of 12-HETE treated U87 cells pre-treated with (B) YM254890, (C) Pert.Toxin or (D) Melittin. (E-G) U87 cells treated with 12-HETE, 12-HETE + Melittin or Vehicle control were used (n=6). (E) Immunoblotting analysis of p-PI3K, PI3K, p-Akt, Akt and GAPDH in cells. Representative immunoblot images are shown. (F) Transwell assay. (G) Relative mRNA levels of *MMP2*, *MMP7*, *MMP9* and *MMP13* normalized with *GAPDH* in cells. All data are represented as the mean  $\pm$  s.e.m. \* $p < 0.05$  (One-way ANOVA).

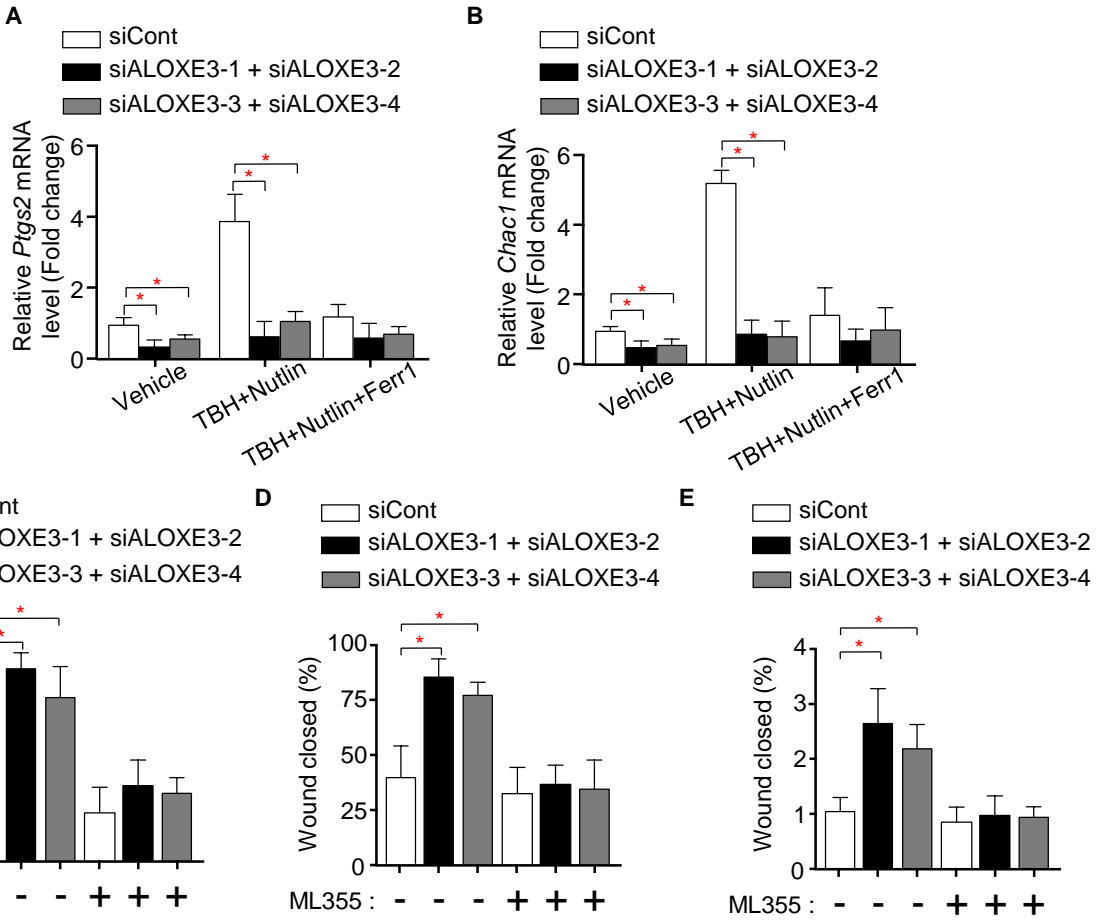

**Figure S14. GBM-promoting functions of shALOXE3-U87 cells are not mediated by off-target effects.**

U87 GBM cells transfected with indicated siALOXE3 or siCont were used (n=6). (A-B) Cells were pre-treated with Nutlin-3a for 12 hours and followed with TBH and Nutlin-3a +/- Ferr1 treatment for additional 8 hours. Relative mRNA levels of (A) *Ptgs2* and (B) *Chac1* normalized with *GAPDH* in cells. (C-E) Cell were treated with ML355 or DMSO as control. (C) Circulating 12-HETE levels in culture medium. (D) Wound healing assay. (E) Transwell assay. All data are represented as the mean  $\pm$  s.e.m. \*p<0.05 (One-way ANOVA).

**Figure 1**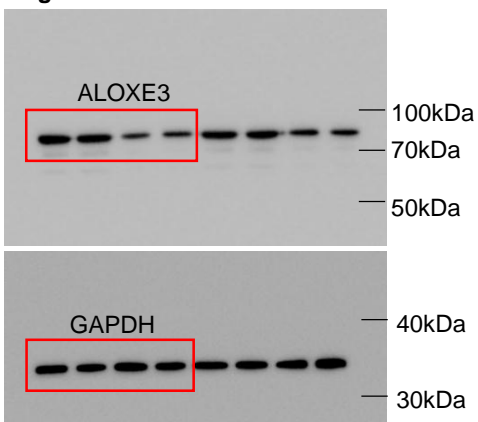**Figure 2**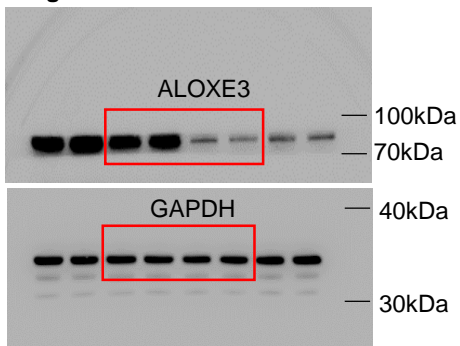**Figure 4**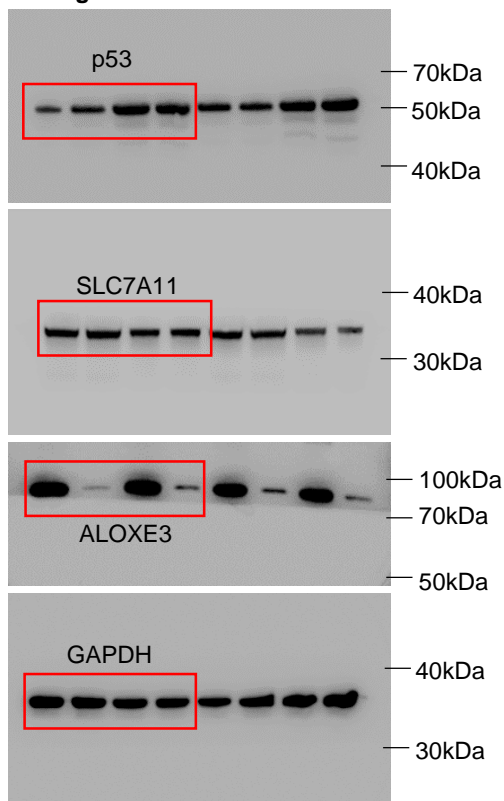**Figure 4 Co-IP**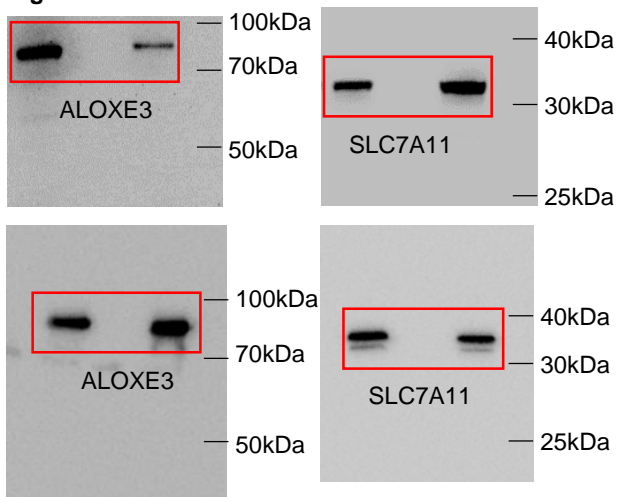**Figure 5**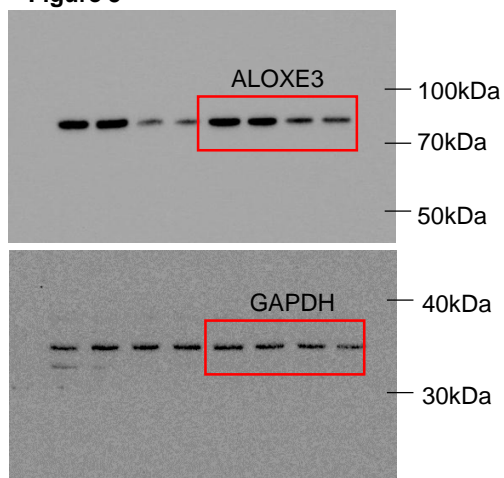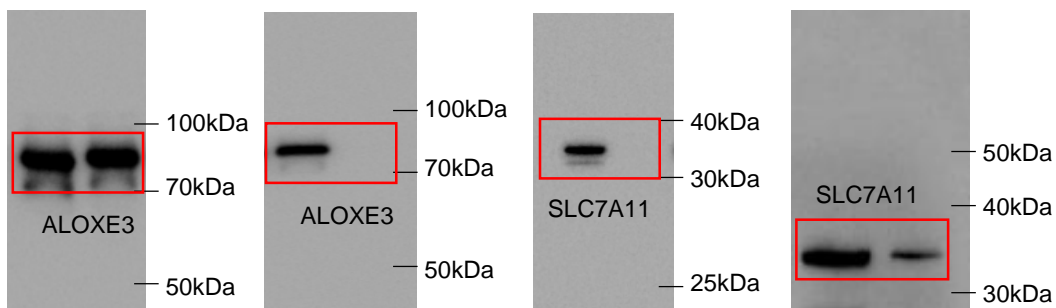**Figure S15. Full images of immunoblotting.**

## Supplementary Tables

| Gene name      | Sequences (5' to 3') |                            |
|----------------|----------------------|----------------------------|
| <i>ALOXE3</i>  | Forward              | ACAACACGCACTTTCTGTGC       |
|                | Reverse              | GGAGCTTGTAGATGGGGTGG       |
| <i>Ptgs2</i>   | Forward              | CTTCACGCATCAGTTTTTCAAG     |
|                | Reverse              | TCACCGTAAATATGATTTAAGTCCAC |
| <i>Chac1</i>   | Forward              | GAACCCTGGTTACCTGGGC        |
|                | Reverse              | CGCAGCAAGTATTCAAGTTTGT     |
| <i>Ezrin</i>   | Forward              | AGCACACGGAGCACTGCAGG       |
|                | Reverse              | GTAACCTCGGACATTGATTGG      |
| <i>Radixin</i> | Forward              | TATGCTGTCCAAGCCAAGTATG     |
|                | Reverse              | CGCTGGGGTAGGAGTCTATCA      |
| <i>Moesin</i>  | Forward              | TGTAACCAGAGAGCTGCTGG       |
|                | Reverse              | GAAGAGCACACATGAGACAGAGAA   |
| <i>MMP2</i>    | Forward              | CAACTACAACCTTCTCCCTCGCA    |
|                | Reverse              | GGTCACATCGCTCCAGACTTG      |
| <i>MMP7</i>    | Forward              | GAGTGAGCTACAGTGGGAACA      |
|                | Reverse              | CTATGACGCGGGAGTTTAACAT     |
| <i>MMP9</i>    | Forward              | GCACCACCACAACATCACCTAT     |
|                | Reverse              | AAACTGGATGACGATGTCTGCG     |
| <i>MMP13</i>   | Forward              | TTGAGCTGGACTCATTGTCTG      |
|                | Reverse              | GGAGCCTCTCAGTCATGGAG       |
| <i>GAPDH</i>   | Forward              | ATCAATGGAAATCCCATCACCA     |
|                | Reverse              | GACTCCACGACGTACTIONCAGCG   |

**Table S1. Primer sequences for mRNA expression analysis.**

| Primer name     | Sequences (5' to 3')                               |
|-----------------|----------------------------------------------------|
| miR-18a RT      | GTCGTATCCAGTGCAGGGTCCGAGGTATTCGCACTGGATACGACCTATCT |
| miR-18a Forward | CCAAGGTAAGGTGCATCTAGTG                             |
| miR-18a Reverse | CAGTGCAGGGTCCGAGGTAT                               |
| U6 Forward      | CTCGCTTCGGCAGCACATA                                |
| U6 Reverse      | CGAATTTGCGTGTTCATCCT                               |

**Table S2. Primer sequences for miRNA expression analysis.**



| Antibodies                     | Catalog Number                     |
|--------------------------------|------------------------------------|
| ALOXE3                         | #NBPI-32533; Novus                 |
| p53                            | #2524; Cell Signaling Technology   |
| SLC7A11                        | #12691S; Cell Signaling Technology |
| PI3K                           | #4249; Cell Signaling Technology   |
| p-PI3K                         | #4228; Cell Signaling Technology   |
| Cleaved Caspase 3              | #9664; Cell Signaling Technology   |
| Akt                            | #ab179463; Abcam                   |
| p-Akt                          | #ab38449; Abcam                    |
| GAPDH                          | #2118; Cell Signaling Technology   |
| Anti-mouse secondary antibody  | #7076S; Cell Signaling Technology  |
| Anti-rabbit secondary antibody | #7074S; Cell Signaling Technology  |

**Table S3. Antibodies for immunoblotting.**

| shRNAs        | Sequences (5' to 3') |                                                                |
|---------------|----------------------|----------------------------------------------------------------|
| ALOXE3 shRNA1 | Sense                | CCGGACCAAAGTCCAATGCACAATACTCGAGTA<br>TTGTGCATTGGACTTTGGTTTTTTG |
|               | Antisense            | AATTCAAAAACCAAAGTCCAATGCACAATACT<br>CGAGTATTGTGCATTGGACTTTGGT  |
| ALOXE3 shRNA2 | Sense                | CCGGGCACTTTCTGTGCACGCATTTCTCGAGAA<br>ATGCGTGCACAGAAAGTGCTTTTTG |
|               | Antisense            | AATTCAAAAAGCACTTTCTGTGCACGCATTTCTC<br>GAGAAATGCGTGCACAGAAAGTGC |
| ALOXE3 shRNA3 | Sense                | CCGGCCACTTCACCTACACCAATTTCTCGAGAA<br>ATTGGTGTAGGTGAAGTGGTTTTG  |
|               | Antisense            | AATTCAAAAACCACTTCACCTACACCAATTTCTC<br>GAGAAATTGGTGTAGGTGAAGTGG |
| ALOXE3 shCont | Sense                | CCGGGCTTCTCCGAACGTGTACGTCTCGAGAC<br>GTGACACGTTCCGAGAAGCTTTTTG  |
|               | Antisense            | AATTCAAAAAGCTTCTCCGAACGTGTACGTCT<br>CGAGACGTGACACGTTCCGAGAAGC  |

**Table S4. Sequences of shRNAs.**

| siRNAs                 | Sequences (5' to 3') |                         |
|------------------------|----------------------|-------------------------|
| siSLC7A11-1            | Sense                | CAGAU AUGCAUCGUCCUUTT   |
|                        | Antisense            | AAGGACGAUGCAUAUCUGTT    |
| siSLC7A11-2            | Sense                | GCAGCUACUGCUGUGAUATT    |
|                        | Antisense            | UAUCACAGCAGUAGCUGCTT    |
| siSLC7A11-3            | Sense                | CCAUGAUUCAUGUCCGCATT    |
|                        | Antisense            | UGC GACAUGAAUCAUGGTT    |
| siALOXE3-1             | Sense                | UAAUACUUGUUUGCUUGCCTT   |
|                        | Antisense            | GGCAAGCAAACAAGUAUUATT   |
| siALOXE3-2             | Sense                | AAGUUGUCGUCUUUGUCAATT   |
|                        | Antisense            | UUGACAAAGACGACAACUUTT   |
| siALOXE3-3             | Sense                | GAUUUCUGAGACAAAGCUCTT   |
|                        | Antisense            | GAGCUUUGUCUCAGAAUUCTT   |
| siALOXE3-4             | Sense                | UAGUAGCCCACGAUUUCUGTT   |
|                        | Antisense            | CAGAAAUCGUGGGCUACUATT   |
| siCont                 | Sense                | UUCUCCGAACGUGUCACGTT    |
|                        | Antisense            | CGUGACACGUUCGGAGAATT    |
| miR-18a mimic          | Sense                | UAAGGUGCAUCUAGUGCAGAUAG |
|                        | Antisense            | CUAUCUGCACUAGAUGCACCUUA |
| mimic-negative control | Sense                | UUCUCCGAACGUGUCACGUTT   |
|                        | Antisense            | ACGUGACACGUUCGGAGAATT   |

**Table S5. Sequences of siRNAs and miRNAs.**
